# Supplementary material for: A multisite validation of brain white matter pathways of resilience to chronic back pain
Source: eLife. 2024 Dec 24;13:RP96312. doi: 10.7554/eLife.96312 (PMC11668529; doi:10.7554/eLife.96312)
Supplement: Figure 7—source data 1. [file elife-96312-fig7-data1.xlsx]

## Sheet: Sheet 1
#Order of notes in the output for Desikan parcellation
#subcortical	regions	（18）
4	LH_Lateral-Ventricle
8	LH_Cerebellum-Cortex
10	LH_Thalamus-Proper
11	LH_Caudate
12	LH_Putamen
13	LH_Pallidum
17	LH_Hippocampus
18	LH_Amygdala
26	LH_Accumbens
43	RH_Lateral-Ventricle
47	RH_Cerebellum-Cortex
49	RH_Thalamus-Proper
50	RH_Caudate
51	RH_Putamen
52	RH_Pallidum
53	RH_Hippocampus
54	RH_Amygdala
58	RH_Accumbens
#cortical	regions	(68)
1001	ctx-lh-bankssts
1002	ctx-lh-caudalanteriorcingulate
1003	ctx-lh-caudalmiddlefrontal
1005	ctx-lh-cuneus
1006	ctx-lh-entorhinal
1007	ctx-lh-fusiform
1008	ctx-lh-inferiorparietal
1009	ctx-lh-inferiortemporal
1010	ctx-lh-isthmuscingulate
1011	ctx-lh-lateraloccipital
1012	ctx-lh-lateralorbitofrontal
1013	ctx-lh-lingual
1014	ctx-lh-medialorbitofrontal
1015	ctx-lh-middletemporal
1016	ctx-lh-parahippocampal
1017	ctx-lh-paracentral
1018	ctx-lh-parsopercularis
1019	ctx-lh-parsorbitalis
1020	ctx-lh-parstriangularis
1021	ctx-lh-pericalcarine
1022	ctx-lh-postcentral
1023	ctx-lh-posteriorcingulate
1024	ctx-lh-precentral
1025	ctx-lh-precuneus
1026	ctx-lh-rostralanteriorcingulate
1027	ctx-lh-rostralmiddlefrontal
1028	ctx-lh-superiorfrontal
1029	ctx-lh-superiorparietal
1030	ctx-lh-superiortemporal
1031	ctx-lh-supramarginal
1032	ctx-lh-frontalpole
1033	ctx-lh-temporalpole
1034	ctx-lh-transversetemporal
1035	ctx-lh-insula
2001	ctx-rh-bankssts
2002	ctx-rh-caudalanteriorcingulate
2003	ctx-rh-caudalmiddlefrontal
2005	ctx-rh-cuneus
2006	ctx-rh-entorhinal
2007	ctx-rh-fusiform
2008	ctx-rh-inferiorparietal
2009	ctx-rh-inferiortemporal
2010	ctx-rh-isthmuscingulate
2011	ctx-rh-lateraloccipital
2012	ctx-rh-lateralorbitofrontal
2013	ctx-rh-lingual
2014	ctx-rh-medialorbitofrontal
2015	ctx-rh-middletemporal
2016	ctx-rh-parahippocampal
2017	ctx-rh-paracentral
2018	ctx-rh-parsopercularis
2019	ctx-rh-parsorbitalis
2020	ctx-rh-parstriangularis
2021	ctx-rh-pericalcarine
2022	ctx-rh-postcentral
2023	ctx-rh-posteriorcingulate
2024	ctx-rh-precentral
2025	ctx-rh-precuneus
2026	ctx-rh-rostralanteriorcingulate
2027	ctx-rh-rostralmiddlefrontal
2028	ctx-rh-superiorfrontal
2029	ctx-rh-superiorparietal
2030	ctx-rh-superiortemporal
2031	ctx-rh-supramarginal
2032	ctx-rh-frontalpole
2033	ctx-rh-temporalpole
2034	ctx-rh-transversetemporal
2035	ctx-rh-insula
